# Supplementary material
Source: MDPI journal article supplement (https://www.mdpi.com/2071-1050/13/10/5404)
Supplement: s1 [file s1]

# **Supplementary Information**

## **Microplastic Types in the Wastewater System**

—

### **A comparison of material flow-based source estimates and the measurement-based load to a wastewater treatment plant**

Emma Fältström<sup>1,2\*</sup>, Kristina Borg Olesen<sup>3</sup> and Stefan Anderberg<sup>1</sup>

<sup>1</sup> Environmental Technology and Management, Department of Management and Engineering, Linköping University, Linköping, Sweden

<sup>2</sup> Sweden Water Research AB, Lund, Sweden

<sup>3</sup> Department of the Built Environment, Aalborg University, Aalborg, Denmark

\* Corresponding author: [emma.faltstrom@liu.se](mailto:emma.faltstrom@liu.se)

**Table S1: Overview of microplastic sources to wastewater and stormwater**

*Table S1: Overview of potential sources of microplastics to urban wastewater and stormwater that was considered in this study. \*considered negligible or too uncertain to estimate. #not detected with the analytical method deployed.*

| Source                     | Sub-source                | Process                                 | References                                                                                                                                                                                                                                                                                                            |
|----------------------------|---------------------------|-----------------------------------------|-----------------------------------------------------------------------------------------------------------------------------------------------------------------------------------------------------------------------------------------------------------------------------------------------------------------------|
| <i>Households</i>          |                           |                                         |                                                                                                                                                                                                                                                                                                                       |
|                            | Synthetic textiles        | Laundry                                 | Belzagui et al. (2019); Browne et al. (2011); Carney-Almroth et al. (2018); Cesa et al. (2020); Dalla Fontana et al. (2020); De Falco et al. (2018a); De Falco et al. (2018b); Galvão et al., 2020; Hernandez et al. (2017); Jönsson et al. (2018); Kelly et al. (2019); Napper & Thompson (2016) Yang et al. (2019). |
|                            | Personal care products    | Personal hygiene                        | Chang (2015); Conkle et al. (2018); Napper et al. (2015)                                                                                                                                                                                                                                                              |
|                            | Cleaning products         | Wet cleaning                            | Swedish Chemicals Agency (2018)                                                                                                                                                                                                                                                                                       |
|                            | Paint                     | Washing equipment                       | Swedish Chemicals Agency (2018)                                                                                                                                                                                                                                                                                       |
|                            | Glue                      | Washing equipment                       | Swedish Chemicals Agency (2018)                                                                                                                                                                                                                                                                                       |
|                            | Dust                      | Wet cleaning                            | Dris et al. (2017)                                                                                                                                                                                                                                                                                                    |
| <i>Enterprises</i>         |                           |                                         |                                                                                                                                                                                                                                                                                                                       |
| • Laundries                | Synthetic textiles        | Laundry                                 | Jeppsson (2017)                                                                                                                                                                                                                                                                                                       |
| • Plastic industry*        |                           | Production spill                        | Karlsson et al. (2018)                                                                                                                                                                                                                                                                                                |
| • Cosmetic industry*       |                           | Production spill                        | Jeppsson (2017)                                                                                                                                                                                                                                                                                                       |
| • Public baths*            | Swimwear                  | Release of textile fibres from swimwear | Jeppsson (2017)                                                                                                                                                                                                                                                                                                       |
| • Car washes*              | Brushes                   | Release of fibres from brushes          | Jeppsson (2017)                                                                                                                                                                                                                                                                                                       |
| • Workshops                | Soap                      | Personal hygiene                        | Observation                                                                                                                                                                                                                                                                                                           |
| • Pharmaceutical industry* | Polymer in coatings       | Production spill                        | Magnusson et al. (2016)                                                                                                                                                                                                                                                                                               |
| • Landfills*               |                           | Leachate                                | He et al. (2019); Sun et al. (2021); van Praagh et al. (2018)                                                                                                                                                                                                                                                         |
| <i>Stormwater</i>          |                           |                                         |                                                                                                                                                                                                                                                                                                                       |
|                            | Road traffic <sup>#</sup> | Wear and tear of tyres and roads        | Kole et al. (2017)                                                                                                                                                                                                                                                                                                    |

|  |                                     |                                            |                                                                  |
|--|-------------------------------------|--------------------------------------------|------------------------------------------------------------------|
|  | Artificial turfs <sup>#</sup>       | Removal by use, maintenance, or rain event | Kole et al. (2017)                                               |
|  | Litter - Cigarette filters          | Removal with rain event                    | Keep Sweden Tidy Foundation, (2017); Register (2000)             |
|  | Paint                               | Wear and removal of painted surfaces       | Verschoor et al. (2016).                                         |
|  | Road markings                       | Wear on road surfaces                      | Magnusson et al. (2016); Sundt et al. (2014)                     |
|  | Atmospheric deposition <sup>*</sup> | Wet and dry deposition                     | Dris et al. (2016); Magnusson et al (2020); Wright et al. (2020) |

**Table S2 Estimated releases from the identified sources and polymer distributions.**

*Table S2: Sources, theoretical contribution, and distribution among polymers that may enter Sjölanda WWTP. For laundry, the polymer distribution displays the synthetic share of the net production and import of textiles in Sweden, which is approximately 30% of the total textile volumes. <sup>#</sup>is a mixture of polymers and as the distribution within this product is not known it was excluded. <sup>\*</sup>is not a polymer and is therefore not included. <sup>#</sup>the polymer is not detected with the analytical method deployed.*

| Source     | Sub-source             | Estimated release (kg/year) | Polymer distribution                                                                                                                              | Reference                       |
|------------|------------------------|-----------------------------|---------------------------------------------------------------------------------------------------------------------------------------------------|---------------------------------|
| Households | Laundry                | 743–12 166                  | Polyester (9%)<br>PP (5%)<br>Acrylic (4%)<br>PA, PU, PVC (3%)<br>PE (2%)                                                                          | Swedish Chemicals Agency (2007) |
|            | Personal care products | Rinse-off: 473–525          | PU (62%)<br>PE (38%)<br>PLA (0.25%)<br>PA (0.16%)<br>Cellulose acetate (0.11%)                                                                    | Amec Foster Wheeler (2017)      |
|            |                        | Leave-on: 358–742           | Distribution not known                                                                                                                            |                                 |
|            | Cleaning products      | 97–103                      | PU (91%)<br>PE (unknown)<br>Rheology modifiers (0.04%)<br>Mix of polyester, PA, Acrylic, Polymethyl methacrylate (PMMA), PET (8.48%) <sup>#</sup> | Amec Foster Wheeler (2017)      |

|             |                                      |               |                                                  |                          |
|-------------|--------------------------------------|---------------|--------------------------------------------------|--------------------------|
|             | Dust                                 | 0.2–462       | See laundry households                           |                          |
|             | Paint                                | 7774          | Distribution not known                           |                          |
|             | Glue                                 | 685           | Distribution not known                           |                          |
| Enterprises | Laundries                            | 30–372        | See laundry households                           |                          |
|             | Workshops/manufacturing              | 2.8–6.3       | PU                                               | EnvoMap                  |
|             |                                      | 0.1–0.8       | PE                                               | EnvoMap                  |
|             |                                      | 11–42         | Epoxy                                            | EnvoMap; OECD, 2009      |
|             | Landfill leachate                    | 0.0024–0.0708 |                                                  | van Praagh et al. (2018) |
|             |                                      | 0.318–0.366   |                                                  | Sun et al. (2021)        |
| Stormwater  | Cigarette filters                    | 499           | Cellulose acetate                                | Register (2000)          |
|             | Wear and removal of painted surfaces | 194–462       | Distribution not known                           | Verschoor et al. (2016)  |
|             |                                      | 551–1076      | Distribution not known                           | Magnusson et al. (2016)  |
|             | Paint in road markings               | 223–519       | AM (35%)*<br>SIS (27%)*<br>EVA (21%)<br>PA (18%) | Magnusson et al. (2016)  |

**Table S3: Summary of source estimates divided by source type.**

*Table S3: Summary of the source estimates divided by source type when only considering the sources where the distribution among polymers is known and only the polymers that can be detected with the applied analytical method.*

| Source             | Min (kg/year) | Max (kg/year) | Min (%) | Max (%) |
|--------------------|---------------|---------------|---------|---------|
| <i>Households</i>  |               |               |         |         |
| Laundry            | 743           | 12 166        |         |         |
| PCPs               | 473           | 525           |         |         |
| Dust               | 0.19          | 462           |         |         |
| Cleaning           | 89            | 94            |         |         |
| Total              | 1306          | 13 247        | 68%     | 92%     |
| <i>Enterprises</i> |               |               |         |         |
| Products           | 14            | 51            |         |         |
| Laundry            | 30            | 372           |         |         |
| Total              | 44            | 423           | 2%      | 3%      |
| <i>Stormwater</i>  |               |               |         |         |
| Cigarette filters  | 499           | 499           |         |         |
| Road marking       | 84            | 200           |         |         |
| Total              | 583           | 699           | 30%     | 5%      |
| SUM                | 1933          | 14 369        |         |         |

**Table S4: Summary of source estimates divided by microplastic types.**

*Table S4: Summary of the source estimates divided by microplastic types when only considering the sources where the distribution among polymers is known and only the polymers that can be detected with the applied analytical method.*

| Microplastic type | Source             | Min (kg/year) | Max (kg/year) | Min (%) | Max (%) | Min (%) excl. cellulose acetate | Max (%) excl. cellulose acetate |
|-------------------|--------------------|---------------|---------------|---------|---------|---------------------------------|---------------------------------|
| Acrylic           | Laundry-Household  | 102.55        | 1678.10       |         |         |                                 |                                 |
| Acrylic           | Laundry-Enterprise | 4.18          | 51.29         |         |         |                                 |                                 |
| Acrylic           | Dust               | 0.03          | 51.72         |         |         |                                 |                                 |
| Acrylic           | Total:             | 106.76        | 1781.11       | 6%      | 12%     | 7%                              | 13%                             |
| Cellulose acetate | PCPs - Household   | 0.53          | 0.59          |         |         |                                 |                                 |
| Cellulose acetate | Cigarette filters  | 498.62        | 498.62        |         |         |                                 |                                 |
| Cellulose acetate | Total:             | 499.15        | 499.21        | 26%     | 3%      |                                 |                                 |
| Epoxy             | Manufacturing      | 11.19         | 41.96         | 1%      | 0.3%    | 1%                              | 0.3%                            |
| EVA               | Road markings      | 45.01         | 107.16        | 2%      | 1%      | 3%                              | 1%                              |
| PA                | PCPs - Household   | 0.75          | 0.83          |         |         |                                 |                                 |
| PA                | Laundry-Household  | 76.91         | 1258.57       |         |         |                                 |                                 |
| PA                | Laundry-Enterprise | 3.14          | 38.47         |         |         |                                 |                                 |
| PA                | Road markings      | 38.95         | 92.73         |         |         |                                 |                                 |
| PA                | Dust               | 0.02          | 36.00         |         |         |                                 |                                 |
| PA                | Total:             | 119.77        | 1426.60       | 6%      | 10%     | 8%                              | 10%                             |
| PE                | PCPs - Household   | 179.05        | 198.86        |         |         |                                 |                                 |
| PE                | PCPs-Enterprise    | 0.14          | 0.79          |         |         |                                 |                                 |
| PE                | Laundry-Household  | 51.27         | 839.05        |         |         |                                 |                                 |
| PE                | Laundry-Enterprise | 2.09          | 25.64         |         |         |                                 |                                 |
| PE                | Dust               | 0.01          | 20.28         |         |         |                                 |                                 |
| PE                | Total:             | 232.56        | 1084.62       | 12%     | 8%      | 16%                             | 8%                              |
| PLA               | PCPs               | 1.20          | 1.34          | 0.1%    | 0.01%   | 0.1%                            | 0.01%                           |

|                                 |                    |         |          |     |     |     |     |
|---------------------------------|--------------------|---------|----------|-----|-----|-----|-----|
| Polyester                       | Laundry-Household  | 230.73  | 3775.72  |     |     |     |     |
| Polyester                       | Laundry-Enterprise | 9.40    | 115.41   |     |     |     |     |
| Polyester                       | Dust               | 0.06    | 214.13   |     |     |     |     |
| Polyester                       | Total:             | 240.19  | 4105.26  | 12% | 29% | 17% | 30% |
| PP                              | Laundry-Household  | 128.18  | 2097.62  |     |     |     |     |
| PP                              | Laundry-Enterprise | 5.22    | 64.12    |     |     |     |     |
| PP                              | Dust               | 0.03    | 47.58    |     |     |     |     |
| PP                              | Total:             | 133.43  | 2209.32  | 7%  | 15% | 9%  | 16% |
| PU                              | PCPs - Household   | 291.65  | 323.91   |     |     |     |     |
| PU                              | PCPs-Enterprise    | 2.78    | 7.78     |     |     |     |     |
| PU                              | Laundry-Household  | 76.91   | 1258.57  |     |     |     |     |
| PU                              | Laundry-Enterprise | 3.13    | 38.47    |     |     |     |     |
| PU                              | Cleaning           | 89.20   | 93.89    |     |     |     |     |
| PU                              | Dust               | 0.02    | 43.45    |     |     |     |     |
| PU                              | Total:             | 463.69  | 1766,07  | 24% | 12% | 32% | 13% |
| PVC                             | Laundry-Household  | 76.91   | 1258.57  |     |     |     |     |
| PVC                             | Laundry-Enterprise | 3.14    | 38.47    |     |     |     |     |
| PVC                             | Dust               | 0.02    | 49.03    |     |     |     |     |
| PVC                             | Total:             | 80.07   | 1346.07  | 4%  | 9%  | 6%  | 10% |
| SUM:                            |                    | 1933.02 | 14368.72 |     |     |     |     |
| SUM excluding cellulose acetate |                    | 1433.87 | 13869.51 |     |     |     |     |

## References

- Amec Foster Wheeler. (2017). *Intentionally added microplastics in products*. London, Great Britain: Author.
- Belzagui, F., Crespi, M., Álvarez, A., Gutiérrez-Bouzán, C., & Vilaseca, M. (2019). Microplastics' emissions: Microfibers' detachment from textile garments. *Environmental Pollution*, 248, 1028–1035. <https://doi.org/10.1016/j.envpol.2019.02.059>
- Browne, M. A., Crump, P., Niven, S. J., Teuten, E., Tonkin, A., Galloway, T., & Thompson, R. (2011). Accumulation of Microplastic on Shorelines Worldwide: Sources and Sinks. *Environmental Science & Technology*, 45(21), 9175–9179. <https://doi.org/10.1021/es201811s>
- Carney Almroth, B. M., Åström, L., Roslund, S., Petersson, H., Johansson, M., & Persson, N.-K. (2018). Quantifying shedding of synthetic fibers from textiles; a source of microplastics released into the environment. *Environmental Science and Pollution Research*, 25(2), 1191–1199. <https://doi.org/10.1007/s11356-017-0528-7>
- Cesa, F. S., Turra, A., Checon, H. H., Leonardi, B., & Baroque-Ramos, J. (2020). Laundering and textile parameters influence fibers release in household washings. *Environmental Pollution*, 257, 113553. <https://doi.org/10.1016/j.envpol.2019.113553>
- Chang, M. (2015). Reducing microplastics from facial exfoliating cleansers in wastewater through treatment versus consumer product decisions. *Marine Pollution Bulletin*, 101(1), 330–333. <https://doi.org/10.1016/j.marpolbul.2015.10.074>
- Conkle, J. L., Del Valle, C. D. B., & Turner, J. W. (2018). Are we underestimating microplastic contamination in aquatic environments? *Environmental management*, 61(1), 1-8.
- Dalla Fontana, G., Mossotti, R., & Montarsolo, A. (2020). Assessment of microplastics release from polyester fabrics: the impact of different washing conditions. *Environmental Pollution*, 113960. <https://doi.org/10.1016/j.envpol.2020.113960>
- De Falco, F., Gullo, M. P., Gentile, G., Di Pace, E., Cocca, M., Gelabert, L., Brouta-Agnés, M., Rovira, A., Escudero, R., Villalba, R., Mossotti, R., Montarsolo, A., Gavignano, S., Tonin, C., & Avella, M. (2018a). Evaluation of microplastic release caused by textile washing processes of synthetic fabrics. *Environmental Pollution*, 236, 916–925. <https://doi.org/10.1016/j.envpol.2017.10.057>
- De Falco, F., Gentile, G., Di Pace, E., Avella, M., & Cocca, M. (2018b). Quantification of microfibrils released during washing of synthetic clothes in real conditions and at lab scale\*. *The European Physical Journal Plus*, 133(7), 257. <https://doi.org/10.1140/epjp/i2018-12123-x>
- Dris, R., Gasperi, J., Mirande, C., Mandin, C., Guerrouache, M., Langlois, V., & Tassin, B. (2017). A first overview of textile fibers, including microplastics, in indoor and outdoor environments. *Environmental Pollution*, 221, 453–458. <https://doi.org/10.1016/j.envpol.2016.12.013>
- Dris, R., Gasperi, J., Saad, M., Mirande, C., & Tassin, B. (2016). Synthetic fibers in atmospheric fallout: A source of microplastics in the environment? *Marine Pollution Bulletin*, 104(1–2), 290–293. <https://doi.org/10.1016/j.marpolbul.2016.01.006>
- Galvão, A., Aleixo, M., De Pablo, H., Lopes, C., & Raimundo, J. (2020). Microplastics in wastewater: microfiber emissions from common household laundry. *Environmental Science and Pollution Research*, (27), 26643–26649. <https://doi.org/10.1007/s11356-020-08765-6>

- Hernandez, E., Nowack, B., & Mitrano, D. M. (2017). Polyester Textiles as a Source of Microplastics from Households: A Mechanistic Study to Understand Microfiber Release During Washing. *Environmental Science & Technology*, 51(12), 7036–7046. <https://doi.org/10.1021/acs.est.7b01750>
- Jeppsson, F. (2017). *Kartläggning av källor till utsläpp av mikroplaster från verksamheter i Käppalaförbundets upptagningsområde*. B.Sc. thesis. Chemical Engineering. Royal Institute of Technology, Stockholm, Sweden.
- Jönsson, C., Levenstam Arturin, O., Hanning, A.-C., Landin, R., Holmström, E., & Roos, S. (2018). Microplastics Shedding from Textiles—Developing Analytical Method for Measurement of Shed Material Representing Release during Domestic Washing. *Sustainability*, 10(7), 2457. <https://doi.org/10.3390/su10072457>
- Karlsson, T. M., Arneborg, L., Broström, G., Almroth, B. C., Gipperth, L., & Hassellöv, M. (2018). The unaccountability case of plastic pellet pollution. *Marine Pollution Bulletin*, 129(1), 52–60. <https://doi.org/10.1016/j.marpolbul.2018.01.041>
- Keep Sweden Tidy Foundation, (2017). *Skräpprapporten 2017. En rapport från Håll Sverige Rent om nedskräpningen i Sverige*. Stockholm, Sweden: Author.
- Kelly, M. R., Lant, N. J., Kurr, M., & Burgess, J. G. (2019). Importance of Water-Volume on the Release of Microplastic Fibers from Laundry. *Environmental Science & Technology*, 53(20), 11735–11744. <https://doi.org/10.1021/acs.est.9b03022>
- Kole, P. J., Löhr, A. J., Van Belleghem, F., & Ragas, A. (2017). Wear and Tear of Tyres: A Stealthy Source of Microplastics in the Environment. *International Journal of Environmental Research and Public Health*, 14(10), 1265.
- Magnusson, K., Eliasson, K., Fråne, A., Haikonen, K., Hultén, J., Olshammar, M.,...Voisin, A. (2016). *Swedish sources and pathways for microplastics to the marine environment – A review of existing data*. (C 138). Revised in March 2017. Stockholm, Sweden: IVL Swedish Environmental Research Institute
- Magnusson, K. Winberg von Friesen, L., Söderlund, K., Karlsson, P.E. & Pihl Karlsson, G. (2020). *Atmosfäriskt nedfall av mikroskräp*. Nr C511. Stockholm, Sweden: IVL Swedish Environmental Research Institute
- Napper, I. E., Bakir, A., Rowland, S. J., & Thompson, R. C. (2015). Characterisation, quantity and sorptive properties of microplastics extracted from cosmetics. *Marine Pollution Bulletin*, 99(1–2), 178–185. <https://doi.org/10.1016/j.marpolbul.2015.07.029>
- Napper, I. E., & Thompson, R. C. (2016). Release of synthetic microplastic plastic fibres from domestic washing machines: Effects of fabric type and washing conditions. *Marine Pollution Bulletin*, 112(1–2), 39–45. <https://doi.org/10.1016/j.marpolbul.2016.09.025>
- He, P., Chen, L., Shao, L., Zhang, H., & Lü, F. (2019). Municipal solid waste (MSW) landfill: A source of microplastics?-Evidence of microplastics in landfill leachate. *Water research*, 159, 38–45. <https://doi.org/10.1016/j.watres.2019.04.060>
- OECD (2009). Emission scenario documents on coating industry (Paints, Lacquers and Varnishes). OECD series on emission scenario documents. Number 22. Paris, France: Author
- Register, K. (2000). Cigarette butts as litter - toxic as well as ugly. *Underwater Naturalist, Bulletin of the American Littoral Society*, 25(2), 23–29.
- Sun, J., Zhu, Z.-R., Li, W.-H., Yan, X., Wang, L.-K., Zhang, L., Jin, J., Dai, X., Ni, B.-J. (2021). Revisiting Microplastics in Landfill Leachate: Unnoticed Tiny Microplastics and Their Fate in Treatment Works. *Water Research*, 190, 116784, [doi:10.1016/j.watres.2020.116784](https://doi.org/10.1016/j.watres.2020.116784).



- Sundt, P., Schulze, P.E. & Syversen, F. (2014). *Sources of microplastics pollution to the marine environment*. (M-321). Oslo, Norway: Norwegian Environment Agency
- Swedish Chemicals Agency. (2007). *The Commodity Guide*.  
<https://webapps.kemi.se/varuguiden/default.aspx>. (Accessed 6th of February 2021)
- Swedish Chemicals Agency (2018). *Mikroplast i kosmetiska produkter och andra kemiska produkter*. Rapport från ett regeringsuppdrag. 2/18. Stockholm, Sweden: Author.
- van Praagh, M., Hartman, C., Brandmyr, E. (2018). *Microplastics in Landfill Leachates in the Nordic Countries*; TemaNord; 2018:557.; Nordic Council of Ministers: Copenhagen; ISBN 978-92-893-5914-6.
- Verschoor, A., de Poorter, L., Dröge, R., Kuenen, J. & de Valk, E. (2016). *Emission of microplastics and potential mitigation measures. Abrasive cleaning agents, paints and tyre wear*. RIVM Report 2016-0026. Bilthoven, Netherlands: National Institute for Public Health and the Environment.
- Wright, S. L., Ulke, J., Font, A., Chan, K. L. A., & Kelly, F. J. (2020). Atmospheric microplastic deposition in an urban environment and an evaluation of transport. *Environment International*, 136, 105411. <https://doi.org/10.1016/j.envint.2019.105411>
- Yang, L., Qiao, F., Lei, K., Li, H., Kang, Y., Cui, S., & An, L. (2019). Microfiber release from different fabrics during washing. *Environmental Pollution*, 249, 136–143.  
<https://doi.org/10.1016/j.envpol.2019.03.011>
